# Supplementary material for: Efficacy of Nutritional Interventions on Inflammatory Markers in Haemodialysis Patients: A Systematic Review and Limited Meta-Analysis
Source: MDPI journal article supplement (doi:10.3390/nu10040397), 2018-03-23
Supplement: s1 [file s1]

Table S1: Study Selection Based on Inclusion Criteria after Reviewing Full Text

| First author, year | Journal                                                 | Title                                                                                                                                                  | Include? | Reason of Exclusion            |
|--------------------|---------------------------------------------------------|--------------------------------------------------------------------------------------------------------------------------------------------------------|----------|--------------------------------|
| Abdollahzad, 2009  | International Journal of Vitamin and Nutrition Research | Effect of vitamin C supplementation on oxidative stress and lipid profiles in hemodialysis patients                                                    | No       | No measure of desired outcomes |
| Adamowicz, 2002    | Medical Science Monitor                                 | Effect of erythropoietin therapy and selenium supplementation on selected antioxidant parameters in blood of uremic patients on long-term hemodialysis | No       | No measure of desired outcomes |
| Aguilera, 1993     | Nephrology Dialysis Transplantation                     | Effect of vitamin E administration on erythropoietin values and anaemia in hemodialysis patients                                                       | No       | No measure of desired outcomes |
| Ahmadi, 2013       | Iranian Journal of Kidney Disease                       | Effect of alpha-lipoic acid and vitamin E supplementation on oxidative stress, inflammation, and malnutrition in hemodialysis patients                 | Yes      |                                |
| Akizawa, 2004      | Therapeutic Apheresis and Dialysis                      | Dose-response study of 22-oxacalcitriol in patients with secondary hyperparathyroidism                                                                 | No       | No measure of desired outcomes |
| An, 2012           | Nutrition Research                                      | Omega-3 fatty acid supplementation increases 1,25-dihydroxyvitamin D and fetuin-A levels in dialysis patients                                          | No       | Mixed dialysis population      |
| Ando, 1999         | Journal of American Society of Nephrology               | Eicosapentanoic acid reduces plasma levels of remnant lipoproteins and prevents in vivo peroxidation of LDL in dialysis patients                       | No       | No measure of desired outcomes |
| Antoniadi, 2005    | Renal Failure                                           | Effect of 1-year oral alpha-tocopherol administration on anticardiolipin antibodies in hemodialysis patients                                           | No       | No measure of desired outcomes |
| Antoniadi, 2008    | Therapeutic Apheresis and Dialysis                      | Effect of one-year oral alpha-tocopherol administration on the antioxidant defense system in hemodialysis patients                                     | No       | No measure of desired outcomes |
| Ardalan, 2007      | Nephrology Dialysis Transplantation                     | Vitamin E and selenium co-supplementation attenuates oxidative stress in haemodialysis patients receiving intra-dialysis iron infusion                 | No       | No measure of desired outcomes |
| Armas, 2012        | Clinical Journal of American Society of Nephrology      | 25-Hydroxyvitamin D response to cholecalciferol supplementation in hemodialysis.                                                                       | No       | No measure of desired outcomes |
| Asemi, 2016        | Molecular Nutrition and                                 | Effect of the omega-3 fatty acid plus vitamin E supplementation on subjective                                                                          | No       | No measure of                  |

|                |                                                      |                                                                                                                                                                                          |     |                                |
|----------------|------------------------------------------------------|------------------------------------------------------------------------------------------------------------------------------------------------------------------------------------------|-----|--------------------------------|
|                | Food Research                                        | global assessment score, glucose metabolism, and lipid concentrations in chronic hemodialysis patients                                                                                   |     | desired outcomes               |
| Asemi, 2016    | International Urology and Nephrology                 | Effects of omega-3 fatty acid plus alpha-tocopherol supplementation on malnutrition-inflammation score, biomarkers of inflammation and oxidative stress in chronic hemodialysis patients | Yes |                                |
| Baldi, 2013    | Journal of Nephrology                                | Effects of hemodialysis and vitamin E supplementation on low-density lipoprotein oxidizability in end-stage renal failure                                                                | No  | No measure of desired outcomes |
| Beavers, 2009  | Journal of Renal Nutrition                           | Effect of over-the-counter fish-oil administration on plasma Lp(a) levels in an end-stage renal disease population                                                                       | No  | No measure of desired outcomes |
| Begum, 2004    | Journal of Renal Nutrition                           | Supplementation with n-3 and n-6 polyunsaturated fatty acids: effects on lipoxygenase activity and clinical symptoms of pruritus in hemodialysis patients                                | No  | No measure of desired outcomes |
| Bhan, 2015     | Clinical Journal of American Society of Nephrology   | Nutritional vitamin D supplementation in dialysis: a randomized trial.                                                                                                                   | No  | No measure of desired outcomes |
| Bhogade, 2008  | Indian Journal of Clinical Biochemistry              | Effect of vitamin E supplementation on oxidative stress in hemodialysis patients.                                                                                                        | No  | No control.                    |
| Biniaz, 2014   | Iranian Journal of Kidney Diseases                   | Effect of Vitamin C Supplementation on Serum Uric Acid in Patients Undergoing Hemodialysis A Randomized Controlled Trial                                                                 | No  | No measure of desired outcomes |
| Biniaz, 2015   | Saudi Journal if Kidney Diseases and Transplantation | Effect of vitamin C supplementation on marital satisfaction in patients undergoing hemodialysis: A randomized, double-blind and placebo-controlled trial                                 | No  | No measure of desired outcomes |
| Boaz, 2000     | Lancet                                               | Secondary prevention with antioxidants of cardiovascular disease in endstage renal disease (SPACE): randomised placebo-controlled trial                                                  | No  | No measure of desired outcomes |
| Bonomini, 1995 | Nephrology Dialysis Transplantation                  | Effects of selenium supplementation on immune parameters in chronic uraemic patients on haemodialysis                                                                                    | No  | No measure of desired outcomes |
| Bowden, 2007   | Journal of Renal Nutrition                           | Effects of omega-3 fatty acid supplementation on vascular access thrombosis in polytetrafluorethylene grafts.                                                                            | No  | No measure of desired outcomes |
| Bowden,        | Nutrition in Clinical                                | Fish oil supplementation lowers C-reactive protein levels independent of                                                                                                                 | Yes |                                |

|                |                                         |                                                                                                                                                                                |     |                                             |
|----------------|-----------------------------------------|--------------------------------------------------------------------------------------------------------------------------------------------------------------------------------|-----|---------------------------------------------|
| 2009           | Practice                                | triglyceride reduction in patients with end-stage renal disease                                                                                                                |     |                                             |
| Calo, 2014     | Clinical Nutrition                      | Molecular biology based assessment of green tea effects on oxidative stress and cardiac remodelling in dialysis patients                                                       | No  | No measure of desired outcomes              |
| Candan, 2002   | Cell Biochemistry and Function          | Effect of vitamin C and zinc on osmotic fragility and lipid peroxidation in zinc-deficient haemodialysis patients                                                              | No  | No measure of desired outcomes              |
| Castilla, 2006 | American Journal of Clinical Nutrition  | Concentrated red grape juice exerts antioxidant, hypolipidemic, and antiinflammatory effects in both hemodialysis patients and healthy subjects                                | No  | Short term intervention (less than 1 month) |
| Castilla, 2008 | American Journal of Clinical Nutrition  | Comparative effects of dietary supplementation with red grape juice and vitamin E on production of superoxide by circulating neutrophil NADPH oxidase in hemodialysis patients | No  | Short term intervention (less than 1 month) |
| Chan, 2006     | Nephrology Dialysis Transplantation     | Effect of ascorbic acid supplementation on plasma isoprostanes in haemodialysis patients.                                                                                      | No  | No measure of desired outcomes              |
| Chang, 2007    | American Journal of Nephrology          | Effects of alpha-lipoic acid on the plasma levels of asymmetric dimethylarginine in diabetic end-stage renal disease patients on hemodialysis: a pilot study                   | Yes |                                             |
| Chao, 2002     | The Journal of Nutritional Biochemistry | Vitamin C and E supplements improve the impaired antioxidant status and decrease plasma lipid peroxides in hemodialysis patients small star, filled                            | No  | No measure of desired outcomes              |
| Chen, 2005     | American Journal of Kidney Diseases     | Variable effects of soy protein on plasma lipids in hyperlipidemic and normolipidemic hemodialysis patients                                                                    | No  | No measure of desired outcomes              |
| Chen, 2006     | British Journal of Nutrition            | Effect of soya protein on serum lipid profile and lipoprotein concentrations in patients undergoing hypercholesterolaemic haemodialysis                                        | No  | No measure of desired outcomes              |
| Coloma, 2011   | Philippine Journal of Internal Medicine | Effects of Vitamin E on a Biomarker of Inflammation and Precursors of Atherogenesis in Chronic Hemodialysis Patients                                                           | Yes |                                             |
| Corredor, 2016 | Food and Chemical Toxicology            | Unfermented grape juice reduce genomic damage on patients undergoing hemodialysis                                                                                              | No  | No measure of desired outcomes              |
| Cristol, 1997  | Nephrology Dialysis Transplantation     | Erythropoietin and oxidative stress in haemodialysis: beneficial effects of vitamin E supplementation                                                                          | No  | No measure of desired outcomes              |

|                        |                                                              |                                                                                                                                                                                |     |                                |
|------------------------|--------------------------------------------------------------|--------------------------------------------------------------------------------------------------------------------------------------------------------------------------------|-----|--------------------------------|
| Cruz-Mora, 2014        | Journal of Renal Nutrition                                   | Effects of a symbiotic on gut microbiota in Mexican patients with end-stage renal disease.                                                                                     | No  | No measure of desired outcomes |
| Dashti-Khavidaki, 2014 | American Journal of Therapeutics                             | Effects of Omega-3 Fatty Acids on Depression and Quality of Life in Maintenance Hemodialysis Patients                                                                          | No  | No measure of desired outcomes |
| Daud, 2012             | Vascular Health and Risk Management                          | Effects of protein and omega-3 supplementation, provided during regular dialysis sessions, on nutritional and inflammatory indices in hemodialysis patients                    | Yes |                                |
| Daud, 2013             | Vascular Health and Risk Management                          | Vitamin E tocotrienol supplementation improves lipid profiles in chronic hemodialysis patients.                                                                                | Yes |                                |
| de Mattos, 2017        | Journal of Renal Nutrition                                   | Omega-3 Fatty Acid Supplementation is Associated With Oxidative Stress and Dyslipidemia, but Does not Contribute to Better Lipid and Oxidative Status on Hemodialysis Patients | No  | No measure of desired outcomes |
| Degar, 2016            | Clinical Journal of American Society of Nephrology           | High Dose Omega-3 Fatty Acid Administration and Skeletal Muscle Protein Turnover in Maintenance Hemodialysis Patients                                                          | No  | No measure of desired outcomes |
| Delanaye, 2013         | Nephrology Dialysis Transplant                               | Cholecalciferol in haemodialysis patients: a randomized, double-blind, proof-of-concept and safety study                                                                       | No  | No measure of desired outcomes |
| Delarue, 2008          | British Journal of Nutrition                                 | Fish oil attenuates adrenergic overactivity without altering glucose metabolism during an oral glucose load in haemodialysis patients                                          | No  | No measure of desired outcomes |
| Diepeveen, 2015        | Journal of Internal Medicine                                 | Effects of atorvastatin and vitamin E on lipoproteins and oxidative stress in dialysis patients: a randomised-controlled trial                                                 | No  | No measure of desired outcomes |
| Donnelly, 1992         | Journal of American Society of Nephrology                    | Effect of n-3 fatty acids from fish oil on hemostasis, blood pressure, and lipid profile of dialysis patients                                                                  | No  | No measure of desired outcomes |
| El-hennawy, 2010       | American Journal of Therapeutics                             | A Selected Controlled Trial of Supplementary Vitamin E for Treatment of Muscle Cramps in Hemodialysis Patients                                                                 | No  | No measure of desired outcomes |
| El-Nakib, 2013         | International Journal of Nephrology and Renovascular Disease | Role of alpha-lipoic acid in the management of anemia in patients with chronic renal failure undergoing hemodialysis                                                           | No  | No measure of desired outcomes |

|                     |                                           |                                                                                                                                                                                                      |     |                                                    |
|---------------------|-------------------------------------------|------------------------------------------------------------------------------------------------------------------------------------------------------------------------------------------------------|-----|----------------------------------------------------|
| Eleftheriadis, 2010 | Therapeutic Apheresis and Dialysis        | Alpha-tocopherol administration decreases serum urate levels in hemodialysis patients.                                                                                                               | No  | No measure of desired outcomes                     |
| Eljaoudi, 2015      | Phytotherapy Research                     | Consumption of Argan Oil Improves Anti-Oxidant and Lipid Status in Hemodialysis Patients                                                                                                             | No  | No measure of desired outcomes                     |
| Ewers, 2009         | Journal of Renal Nutrition                | Effects of unsaturated fat dietary supplements on blood lipids, and on markers of malnutrition and inflammation in hemodialysis patients                                                             | No  | Non-relevant nutrients                             |
| Fanti, 2006         | Nephrology Dialysis Transplantation       | Positive effect of dietary soy in ESRD patients with systemic inflammation-- correlation between blood levels of the soy isoflavones and the acute-phase reactants                                   | Yes |                                                    |
| Fijter, 1995        | Haematologica                             | Does Additional Treatment With Fish Oil Mitigate The Side Effects Of Recombinant Human Erythropoietin In Dialysis Patients?                                                                          | No  | No measure of desired outcomes                     |
| Fukuda, 2015        | PLoS One                                  | Effects of nutritional supplementation on fatigue, and autonomic and immune dysfunction in patients with end-stage renal disease: a randomized, double-blind, placebo-controlled, multicenter trial. | No  | Intervention using enteral nutrition supplement    |
| Fumeron, 2005       | Nephrology Dialysis Transplantation       | Effects of oral vitamin C supplementation on oxidative stress and inflammation status in haemodialysis patients                                                                                      | Yes |                                                    |
| Galli, 2001         | Kidney International Supplement           | Vitamin E, lipid profile, and peroxidation in hemodialysis patients                                                                                                                                  | No  | No measure of desired outcomes                     |
| Ghanel, 2012        | Iranian Red Crescent Medical Journal      | Efficacy of omega-3 fatty acids supplementation in treatment of uremic pruritus in hemodialysis patients: a double-blind randomized controlled trial.                                                | No  | No measure of desired outcomes                     |
| Gharekhani, 2014    | European Journal of Clinical Pharmacology | The effect of omega-3 fatty acids on depressive symptoms and inflammatory markers in maintenance hemodialysis patients: a randomized, placebo-controlled clinical trial.                             | Yes |                                                    |
| Gharekhani, 2014    | Journal of Renal Nutrition                | Effects of oral supplementation with omega-3 fatty acids on nutritional state and inflammatory markers in maintenance hemodialysis patients                                                          | No  | Duplicate of Gharekhani 2014, Eur J Clin Pharmacol |
| Gharekhani 2016     | Iranian Journal of Kidney Disease         | Potential Effects of Omega-3 Fatty Acids on Insulin Resistance and Lipid Profile in Maintenance Hemodialysis Patients: a Randomized Placebo-                                                         | No  | No measure of desired outcomes                     |

|                  |                                           |                                                                                                                                                                                           |     |                                |
|------------------|-------------------------------------------|-------------------------------------------------------------------------------------------------------------------------------------------------------------------------------------------|-----|--------------------------------|
|                  |                                           | Controlled Trial                                                                                                                                                                          |     |                                |
| Giray, 2003      | Clinica Chimica Acta                      | The effect of vitamin E supplementation on antioxidant enzyme activities and lipid peroxidation levels in hemodialysis patients                                                           | No  | No measure of desired outcomes |
| Guo, 2013        | Nutrients                                 | Zinc supplementation alters plasma aluminum and selenium status of patients undergoing dialysis: a pilot study.                                                                           | No  | No measure of desired outcomes |
| Hansen, 2014     | BMC Nephrology                            | The influence of vitamin D analogs on calcification modulators, N-terminal pro-B-type natriuretic peptide and inflammatory markers in hemodialysis patients: a randomized crossover study | No  | No control                     |
| Harving, 2015    | Clinical Nephrology                       | n-3 polyunsaturated fatty acids and adiponectin in patients with end-stage renal disease.                                                                                                 | Yes |                                |
| Himmelfarb, 2007 | Journal of Renal Nutrition                | Gamma-tocopherol and docosahexaenoic acid decrease inflammation in dialysis patients                                                                                                      | Yes |                                |
| Himmelfarb, 2014 | Journal of American Society of Nephrology | Provision of antioxidant therapy in hemodialysis (PATH): a randomized clinical trial                                                                                                      | Yes |                                |
| Hodkova, 2005    | Renal Failure                             | Influence of parenteral iron therapy and oral vitamin E supplementation on neutrophil respiratory burst in chronic hemodialysis patients                                                  | No  | No measure of desired outcomes |
| Hodkova, 2006    | Renal Failure                             | Influence of oral vitamin E therapy on micro-inflammation and cardiovascular disease markers in chronic hemodialysis patients                                                             | Yes |                                |
| Hsu, 2007        | American Journal of Clinical Nutrition    | Chronic green tea extract supplementation reduces hemodialysis-enhanced production of hydrogen peroxide and hypochlorous acid, atherosclerotic factors, and proinflammatory cytokines     | No  | No randomization               |
| Hung, 2013       | Journal of Renal Nutrition                | A pilot study of active vitamin D administration and insulin resistance in African American patients undergoing chronic hemodialysis                                                      | Yes |                                |
| Hung, 2015       | Nephrology Dialysis Transplant            | Omega-3 fatty acids inhibit the up-regulation of endothelial chemokines in maintenance hemodialysis patients                                                                              | Yes |                                |
| Ibrahim, 2015    | Hemodialysis International                | Study of the effect of vitamin D supplementation on glycemic control in type 2 diabetic prevalent hemodialysis patients                                                                   | No  | No measure of desired outcomes |
| Irish, 2017      | JAMA Internal Medicine                    | Effect of Fish Oil Supplementation and Aspirin Use on Arteriovenous Fistula Failure in Patients Requiring Hemodialysis: A Randomized Clinical Trial                                       | No  | No measure of desired outcomes |

|                      |                                             |                                                                                                                                                                         |     |                                                 |
|----------------------|---------------------------------------------|-------------------------------------------------------------------------------------------------------------------------------------------------------------------------|-----|-------------------------------------------------|
| Islam, 2000          | Atherosclerosis                             | Alpha-tocopherol supplementation decreases the oxidative susceptibility of LDL in renal failure patients on dialysis therapy                                            | No  | No measure of desired outcomes                  |
| Inal, 1999           | Free Radical Research                       | Antioxidant status and lipid peroxidation in hemodialysis patients undergoing erythropoietin and erythropoietin-vitamin E combined therapy                              | No  | No measure of desired outcomes                  |
| Jabbari, 2016        | Romanian Journal of Internal Medicine       | The Effect of Omega-3 Supplement on Serum Lipid Profile in Patients Undergoing Hemodialysis: A Randomized Clinical Trial                                                | No  | No measure of desired outcomes                  |
| Janiques, 2014       | Journal Brasileiro de Nefrologia            | Effects of grape powder supplementation on inflammatory and antioxidant markers in hemodialysis patients: a randomized double-blind study                               | Yes |                                                 |
| Jean, 2008           | Nephrology Dialysis Transplant              | Daily oral 25-hydroxycholecalciferol supplementation for vitamin D deficiency in haemodialysis patients: effects on mineral metabolism and bone markers                 | No  | No measure of desired outcomes                  |
| Kajbaf, 2016         | Journal of Research in Pharmacy Practice    | Does Omega-3 supplementation decrease carotid intima-media thickening in hemodialysis patients?                                                                         | No  | No measure of desired outcomes                  |
| Kalantar-Zadeh, 2005 | Journal of Renal Nutrition                  | An anti-inflammatory and antioxidant nutritional supplement for hypoalbuminemic hemodialysis patients: a pilot/feasibility study                                        | No  | Intervention using enteral nutrition supplement |
| Kamgar, 2009         | Journal of the National Medical Association | Antioxidant therapy does not ameliorate oxidative stress and inflammation in patients with end-stage renal disease                                                      | Yes |                                                 |
| Khabbazi, 2012       | Journal of Renal Nutrition                  | Effects of alpha-lipoic acid supplementation on inflammation, oxidative stress, and serum lipid profile levels in patients with end-stage renal disease on hemodialysis | Yes |                                                 |
| Khajehdehi, 2000     | Journal of Renal Nutrition                  | Lipid-lowering effect of polyunsaturated fatty acids in hemodialysis patients.                                                                                          | No  | No measure of desired outcomes                  |
| Khajehdehi, 2001     | Nephrology Dialysis Transplantation         | A randomized, double-blind, placebo-controlled trial of supplementary vitamins E, C and their combination for treatment of haemodialysis cramps                         | No  | No measure of desired outcomes                  |
| Khalatbari, 2013     | Hemodialysis International                  | Effects of flaxseed consumption on systemic inflammation and serum lipid profile in hemodialysis patients with lipid abnormalities                                      | Yes |                                                 |
| Kidir, 2015          | Renal Failure                               | Effect of cholecalciferol replacement on vascular calcification and left ventricular mass index in dialysis patients                                                    | No  | No randomization                                |

|                  |                                            |                                                                                                                                                                                  |     |                                |
|------------------|--------------------------------------------|----------------------------------------------------------------------------------------------------------------------------------------------------------------------------------|-----|--------------------------------|
| Kooshki, 2011    | Annals of Nutrition and Metabolism         | Effects of marine omega-3 fatty acids on serum systemic and vascular inflammation markers and oxidative stress in hemodialysis patients                                          | Yes |                                |
| Kooshki, 2011    | Renal Failure                              | Effects of omega-3 fatty acids on serum lipids, lipoprotein (a), and hematologic factors in hemodialysis patients                                                                | No  | No measure of desired outcomes |
| Kuragano, 2014   | International Journal of Artificial Organs | Effect of protoconized therapy for renal anemia on adverse events of patients with maintenance hemodialysis                                                                      | No  | No measure of desired outcomes |
| Lee, 2015        | Marine Drugs                               | The effects of omega-3 fatty acid on vitamin D activation in hemodialysis patients: a pilot study                                                                                | Yes |                                |
| Lemos, 2012      | Nutrition Research                         | Flaxseed oil supplementation decreases C-reactive protein levels in chronic hemodialysis patients                                                                                | Yes |                                |
| Li, 2014         | PLoS One                                   | Effect of cholecalciferol supplementation on inflammation and cellular alloimmunity in hemodialysis patients: data from a randomized controlled pilot trial                      | No  | No measure of desired outcomes |
| Lok, 2012        | Journal of American Medical Association    | Effect of fish oil supplementation on graft patency and cardiovascular events among patients with new synthetic arteriovenous hemodialysis grafts: a randomized controlled trial | No  | No measure of desired outcomes |
| Løssl, 1999      | Lipids                                     | The effect of n-3 fatty acids on leukotriene formation from neutrophils in patients on hemodialysis.                                                                             | No  | No measure of desired outcomes |
| Lu, 2007         | American Journal of Kidney Disease         | Serum vitamin E and oxidative protein modification in hemodialysis: a randomized clinical trial                                                                                  | No  | No measure of desired outcomes |
| Maccarrone, 1999 | Journal of American Society of Nephrology  | Activation of 5-lipoxygenase and related cell membrane lipoperoxidation in hemodialysis patients.                                                                                | No  | No measure of desired outcomes |
| Mafra, 2009      | Nephrology Dialysis Transplantation        | Alpha-tocopherol supplementation decreases electronegative low-density lipoprotein concentration [LDL(-)] in haemodialysis patients                                              | No  | No measure of desired outcomes |
| Mann, 2016       | Nutrients                                  | The VITAH Trial-Vitamin D Supplementation and Cardiac Autonomic Tone in Patients with End-Stage Kidney Disease on Hemodialysis: A Blinded, Randomized Controlled Trial           | No  | No measure of desired outcomes |
| Marckmann, 2012  | Nephrology Dialysis Transplantation        | Randomized controlled trial of cholecalciferol supplementation in chronic kidney disease patients with hypovitaminosis D                                                         | Yes |                                |



|                   |                                           |                                                                                                                                                                                                        |     |                                |
|-------------------|-------------------------------------------|--------------------------------------------------------------------------------------------------------------------------------------------------------------------------------------------------------|-----|--------------------------------|
| Massart, 2014     | American Journal of Kidney Diseases       | Biochemical parameters after cholecalciferol repletion in hemodialysis: results From the VitaDial randomized trial                                                                                     | No  | No measure of desired outcomes |
| Mazani, 2013      | Journal of Renal Nutrition                | Effects of zinc supplementation on antioxidant status and lipid peroxidation in hemodialysis patients                                                                                                  | No  | No measure of desired outcomes |
| Mazzaferro, 2000  | Nephrology Dialysis Transplantation       | Changes in bone turnover after parathyroidectomy in dialysis patients: role of calcitriol administration                                                                                               | No  | No measure of desired outcomes |
| Maxwell, 1978     | Clinical Pharmacology and Therapeutics    | Calcitriol in dialysis patients                                                                                                                                                                        | No  | No measure of desired outcomes |
| Meireles, 2016    | Clinical Nutrition                        | Effect of cholecalciferol on vitamin D-regulatory proteins in monocytes and on inflammatory markers in dialysis patients: A randomized controlled trial                                                | No  | Mixed dialysis population      |
| Merino, 2015      | Therapeutic Apheresis and Dialysis        | Effects of a single, high oral dose of 25-hydroxycholecalciferol on the mineral metabolism markers in hemodialysis patients                                                                            | No  | No measure of desired outcomes |
| Mieczkowski, 2014 | Medical Science Monitor                   | Long-term cholecalciferol administration in hemodialysis patients: a single-center randomized pilot study                                                                                              | No  | No measure of desired outcomes |
| Mirfatahi, 2016   | International Urology and Nephrology      | Effect of flaxseed oil on serum systemic and vascular inflammation markers and oxidative stress in hemodialysis patients: a randomized controlled trial                                                | Yes |                                |
| Mirfatahi, 2016   | Iranian Journal of Kidney Diseases        | Effects of Flaxseed Oil on Serum Lipids and Lipoproteins in Hemodialysis Patients: a Randomized Controlled Trial                                                                                       | No  | No measure of desired outcomes |
| Miskulin, 2016    | Journal of American Society of Nephrology | Ergocalciferol Supplementation in Hemodialysis Patients With Vitamin D Deficiency: A Randomized Clinical Trial                                                                                         | Yes |                                |
| Moeinzadeh, 2016  | Iranian Journal of Kidney Diseases        | Effects of Omega-3 Fatty Acid Supplementation on Serum Biomarkers, Inflammatory Agents, and Quality of Life of Patients on Hemodialysis                                                                | No  | No measure of desired outcomes |
| Naeini, 2017      | Journal of Research in Pharmacy Practice  | The Effect of Vitamin D Administration on Intracellular Adhesion Molecule-1 and Vascular Cell Adhesion Molecule-1 Levels in Hemodialysis Patients: A Placebo-controlled, Double-blinded Clinical Trial | No  | No measure of desired outcomes |
| Naini, 2015       | Journal of Research in Medical Sciences   | The effect of Vitamin D administration on treatment of anemia in end-stage renal disease patients with Vitamin D deficiency on hemodialysis: A placebo-controlled, double-blind clinical trial         | No  | No measure of desired outcomes |
| Naini, 2016       | Journal of Research in                    | The effect of vitamin D administration on serum leptin and adiponectin levels                                                                                                                          | No  | No measure of                  |

|                         |                                        |                                                                                                                                                                            |     |                                |
|-------------------------|----------------------------------------|----------------------------------------------------------------------------------------------------------------------------------------------------------------------------|-----|--------------------------------|
|                         | Medical Sciences                       | in end-stage renal disease patients on hemodialysis with vitamin D deficiency: A placebo-controlled double-blind clinical trial                                            |     | desired outcomes               |
| Nakabayashi, 2011       | Nephrology Dialysis Transplant         | Effects of synbiotic treatment on serum level of p-cresol in haemodialysis patients: a preliminary study                                                                   | No  | No measure of desired outcomes |
| Natarajan, 2014         | BioMed Research International          | Randomized controlled trial of strain-specific probiotic formulation (Renadyl) in dialysis patients                                                                        | Yes |                                |
| Navarro-González, 2013  | Journal of Clinical Pharmacology       | Anti-inflammatory profile of paricalcitol in hemodialysis patients: a prospective, open-label, pilot study                                                                 | No  | No control                     |
| Ohkawa, 2004            | Atherosclerosis                        | Pro-oxidative effect of alpha-tocopherol in the oxidation of LDL isolated from co-antioxidant-depleted non-diabetic hemodialysis patients                                  | No  | No measure of desired outcomes |
| Omran, 2015             | Nephro-Urology Monthly                 | The Effect of Selenium Supplementation on Acute Phase Reactants and Thyroid Function Tests in Hemodialysis Patients                                                        | Yes |                                |
| Omran, 2016             | Journal of Renal Injury Prevention     | Effect of selenium supplementation on lipid profile in hemodialysis patients.                                                                                              | No  | No measure of desired outcomes |
| Pakfetrat, 2015         | Journal of Nephrology                  | Effects of turmeric on uremic pruritus in end stage renal disease patients: a double-blind randomized clinical trial                                                       | Yes |                                |
| Pakfetrat, 2015         | Hemodialysis International             | Role of turmeric in oxidative modulation in end-stage renal disease patients.                                                                                              | No  | No measure of desired outcomes |
| Peck, 1996              | American Journal of Clinical Nutrition | Effect of three sources of long-chain fatty acids on the plasma fatty acid profile, plasma prostaglandin E2 concentrations, and pruritus symptoms in hemodialysis patients | No  | No measure of desired outcomes |
| Perunicic-Pekovis, 2007 | Nephrology                             | Effect of n-3 fatty acids on nutritional status and inflammatory markers in haemodialysis patients.                                                                        | No  | No control                     |
| Poulia, 2011            | Journal of Renal Nutrition             | Omega-3 fatty acids supplementation does not affect serum lipids in chronic hemodialysis patients                                                                          | Yes |                                |
| Ramos, 2005             | Nefrologia                             | Lipoprotein oxidation profile in end stage renal disease patients. Role of vitamin C supplementation                                                                       | No  | No measure of desired outcomes |

|                          |                                                    |                                                                                                                                                                                          |     |                                                 |
|--------------------------|----------------------------------------------------|------------------------------------------------------------------------------------------------------------------------------------------------------------------------------------------|-----|-------------------------------------------------|
| Ramos, 2015              | Journal of Renal Nutrition                         | The short-term effects of olive oil and flaxseed oil for the treatment of constipation in hemodialysis patients                                                                          | No  | No measure of desired outcomes                  |
| Rasic-Milutinovic, 2007  | Renal Failure                                      | Effects of N-3 PUFAs supplementation on insulin resistance and inflammatory biomarkers in hemodialysis patients                                                                          | No  | No control                                      |
| Rasmussen, 2010          | Nutrition Research                                 | The content of docosahexaenoic acid in serum phospholipid is inversely correlated with plasma homocysteine levels in patients with end-stage renal disease                               | No  | No measure of desired outcomes                  |
| Rassaf, 2016             | Clinical Journal of American Society of Nephrology | Vasculoprotective Effects of Dietary Cocoa Flavanols in Patients on Hemodialysis: A Double-Blind, Randomized, Placebo-Controlled Trial                                                   | Yes |                                                 |
| Rattanasompattikul, 2013 | Journal of Cachexia, Sarcopenia and Muscle         | Anti-Inflammatory and Anti-Oxidative Nutrition in Hypoalbuminemic Dialysis Patients (AIONID) study: results of the pilot-feasibility, double-blind, randomized, placebo-controlled trial | No  | Intervention using enteral nutrition supplement |
| Ristic-Medic, 2014       | Scientific World Journal                           | Effects of dietary milled seed mixture on fatty acid status and inflammatory markers in patients on hemodialysis                                                                         | No  | No control                                      |
| Rivara, 2015             | Journal of Renal Nutrition                         | A pilot randomized crossover trial assessing the safety and short-term effects of pomegranate supplementation in hemodialysis patients                                                   | No  | No control                                      |
| Rodhe, 2013              | Journal of Renal Nutrition                         | The effect of sea buckthorn supplement on oral health, inflammation, and DNA damage in hemodialysis patients: a double-blinded, randomized crossover study                               | No  | Non-relevant nutrients                          |
| Roosbeh, 2011            | Renal Failure                                      | Comparative effects of silymarin and vitamin E supplementation on oxidative stress markers, and hemoglobin levels among patients on hemodialysis                                         | No  | No measure of desired outcomes                  |
| Rusu, 2013               | International Urology and Nephrology               | The influence of vitamin E supplementation on erythropoietin responsiveness in chronic hemodialysis patients with low levels of erythrocyte superoxide dismutase                         | No  | No measure of desired outcomes                  |
| Safa, 2014               | International Urology and Nephrology               | Effects of alpha lipoic acid supplementation on serum levels of IL-8 and TNF- $\alpha$ in patient with ESRD undergoing hemodialysis                                                      | Yes |                                                 |
| Sagheb, 2012             | Sleep Medicine                                     | Efficacy of vitamins C, E, and their combination for treatment of restless legs                                                                                                          | No  | No measure of                                   |

|                  |                                                    |                                                                                                                                                                            |     |                                |
|------------------|----------------------------------------------------|----------------------------------------------------------------------------------------------------------------------------------------------------------------------------|-----|--------------------------------|
|                  |                                                    | syndrome in hemodialysis patients: a randomized, double-blind, placebo-controlled trial.                                                                                   |     | desired outcomes               |
| Saifullah, 2007  | Nephrology Dialysis Transplantation                | Oral fish oil supplementation raises blood omega-3 levels and lowers C-reactive protein in haemodialysis patients--a pilot study                                           | Yes |                                |
| Salehi, 2013     | Nephrology Dialysis Transplantation                | Selenium supplementation improves the nutritional status of hemodialysis patients: a randomized, double-blind, placebo-controlled trial                                    | Yes |                                |
| Sato, 2003       | Clinical Nephrology                                | Effects of vitamin supplementation on microcirculatory disturbance in hemodialysis patients without peripheral arterial disease                                            | No  | No measure of desired outcomes |
| Schmitz, 2002    | Journal of American Society of Nephrology          | Prophylaxis of hemodialysis graft thrombosis with fish oil: double-blind, randomized, prospective trial.                                                                   | No  | No measure of desired outcomes |
| Seibert, 2013    | Nephron Clinical Practice                          | Influence of cholecalciferol supplementation in hemodialysis patients on monocyte subsets: a randomized, double-blind, placebo-controlled clinical trial                   | Yes |                                |
| Shema-Didi, 2012 | Free Radical Biology and Medicine                  | One year of pomegranate juice intake decreases oxidative stress, inflammation, and incidence of infections in hemodialysis patients: A randomized placebo-controlled trial | Yes |                                |
| Shema-Didi, 2013 | Nutrition Research                                 | Pomegranate juice intake attenuates the increase in oxidative stress induced by intravenous iron during hemodialysis                                                       | No  | No measure of desired outcomes |
| Shema-Didi, 2014 | Nutrition Journal                                  | Does Pomegranate intake attenuate cardiovascular risk factors in hemodialysis patients?                                                                                    | No  | No measure of desired outcomes |
| Shirazian, 2013  | Journal of Renal Nutrition                         | The effect of ergocalciferol on uremic pruritus severity: a randomized controlled trial                                                                                    | No  | No measure of desired outcomes |
| Siefker, 2006    | Journal of Medicinal Food                          | Safety and antioxidant effects of a modest soy protein intervention in hemodialysis patients                                                                               | Yes |                                |
| Sinsakul, 1984   | American Journal of Clinical Nutrition             | Lack of effect of vitamin E therapy on the anemia of patients receiving hemodialysis                                                                                       | No  | No measure of desired outcomes |
| Sirich, 2014     | Clinical Journal of American Society of Nephrology | Effect of increasing dietary fiber on plasma levels of colon-derived solutes in hemodialysis patients                                                                      | Yes |                                |

|                           |                                                    |                                                                                                                                                                         |     |                                |
|---------------------------|----------------------------------------------------|-------------------------------------------------------------------------------------------------------------------------------------------------------------------------|-----|--------------------------------|
| Siroverm<br>2008          | Renal Failure                                      | Beneficial hematologic effects of daily oral ascorbic acid therapy in ESRD patients with anemia and abnormal iron homeostasis: a preliminary study                      | No  | No measure of desired outcomes |
| Smith, 2003               | Lipids                                             | Vitamin E supplementation increases circulating vitamin E metabolites tenfold in end-stage renal disease patients                                                       | No  | No measure of desired outcomes |
| Sørensen,<br>2015         | Journal of Renal Nutrition                         | The Effect of n-3 Fatty Acids on Small Dense Low-Density Lipoproteins in Patients With End-Stage Renal Disease: A Randomized Placebo-Controlled Intervention Study      | No  | No measure of desired outcomes |
| Sohrabi,<br>2016          | American Journal of Kidney Diseases                | Intradialytic Oral Protein Supplementation and Nutritional and Inflammation Outcomes in Hemodialysis: A Randomized Controlled Trial                                     | Yes |                                |
| Soleimani,<br>2017        | Kidney International                               | Probiotic supplementation in diabetic hemodialysis patients has beneficial metabolic effects.                                                                           | Yes |                                |
| Sultana, 2016             | International Urology and Nephrology               | Oral vitamin C supplementation reduces erythropoietin requirement in hemodialysis patients with functional iron deficiency                                              | No  | No measure of desired outcomes |
| Svensson,<br>2006         | Clinical Journal of American Society of Nephrology | N-3 fatty acids as secondary prevention against cardiovascular events in patients who undergo chronic hemodialysis: a randomized, placebo-controlled intervention trial | No  | No measure of desired outcomes |
| Svensson,<br>2007         | Journal of Renal Nutrition                         | The effect of n-3 fatty acids on heart rate variability in patients treated with chronic hemodialysis.                                                                  | No  | No measure of desired outcomes |
| Svensson,<br>2008         | Nephrology Dialysis Transplantation                | The effect of n-3 fatty acids on lipids and lipoproteins in patients treated with chronic haemodialysis: a randomized placebo-controlled intervention study.            | No  | No measure of desired outcomes |
| Svensson,<br>2010         | Journal of Nephrology                              | The effect of n-3 fatty acids on levels of methylarginines in patients with end-stage renal disease.                                                                    | No  | No measure of desired outcomes |
| Tabibi, 2017              | Hemodialysis International                         | Effects of flaxseed oil on blood hepcidin and hematologic factors in hemodialysis patients                                                                              | No  | No measure of desired outcomes |
| Taccone-Gallucci,<br>2006 | Kidney International                               | N-3 PUFAs reduce oxidative stress in ESRD patients on maintenance HD by inhibiting 5-lipoxygenase activity                                                              | No  | No measure of desired outcomes |
| Tayebi-Khosroshahi,       | Iranian Journal of Kidney Disease                  | Effect of omega-3 fatty acid on oxidative stress in patients on hemodialysis.                                                                                           | No  | No measure of desired outcomes |

|                          |                                                      |                                                                                                                                                                         |     |                                |
|--------------------------|------------------------------------------------------|-------------------------------------------------------------------------------------------------------------------------------------------------------------------------|-----|--------------------------------|
| 2010                     |                                                      |                                                                                                                                                                         |     |                                |
| Tayebi-Khosroshahi, 2012 | Saudi Journal of Kidney Diseases and Transplantation | Effect of treatment with omega-3 fatty acids on C-reactive protein and tumor necrosis factor- $\alpha$ in hemodialysis patients                                         | No  | No control                     |
| Tayebi-Khosroshahi, 2013 | Iranian Journal of Kidney Disease                    | Effect of omega-3 supplementation on serum level of homocysteine in hemodialysis patients                                                                               | No  | No measure of desired outcomes |
| Tayebi-Khosroshahi, 2013 | Nephro-Urology Monthly                               | Comparison of vitamin e and L-carnitine, separately or in combination in patients with intradialytic complications                                                      | No  | No measure of desired outcomes |
| Taziki, 2007             | Saudi Journal of Kidney Diseases and Transplantation | The effect of low dose omega-3 on plasma lipids in hemodialysis patients                                                                                                | No  | No measure of desired outcomes |
| Temple, 2000             | Journal of Renal Nutrition                           | Selenate-supplemented nutritional formula increases plasma selenium in hemodialysis patients                                                                            | No  | No measure of desired outcomes |
| Tomayko, 2015            | Journal of Renal Nutrition                           | Intradialytic protein supplementation reduces inflammation and improves physical function in maintenance hemodialysis patients                                          | Yes |                                |
| Tonelli, 2015            | BMC Nephrology                                       | Trace element supplementation in hemodialysis patients: a randomized controlled trial                                                                                   | No  | No measure of desired outcomes |
| Tokmak, 2008             | Nephrology Dialysis Transplant                       | High-dose cholecalciferol to correct vitamin D deficiency in haemodialysis patients                                                                                     | No  | No measure of desired outcomes |
| Túri, 1999               | Nephrology Dialysis Transplantation                  | Erythropoietin and oxidative stress in haemodialysis: beneficial effects of vitamin E supplementation.                                                                  | No  | No measure of desired outcomes |
| VanBeber, 1995           | Journal of Renal Nutrition                           | The effect of dietary omega-3, -6, and -9 fatty acid supplements on serum fatty acid concentrations in renal dialysis patients: Implications for immune response        | No  | No measure of desired outcomes |
| Viramontes-Hörner, 2015  | Journal of Renal Nutrition                           | Effect of a symbiotic gel (Lactobacillus acidophilus + Bifidobacterium lactis + inulin) on presence and severity of gastrointestinal symptoms in hemodialysis patients. | Yes |                                |

|                  |                                                             |                                                                                                                                                                                          |     |                                |
|------------------|-------------------------------------------------------------|------------------------------------------------------------------------------------------------------------------------------------------------------------------------------------------|-----|--------------------------------|
| Wang, 2016       | Journal of Clinical Psychopharmacology                      | Efficacy of High-Dose Supplementation With Oral Vitamin D3 on Depressive Symptoms in Dialysis Patients With Vitamin D3 Insufficiency: A Prospective, Randomized, Double-Blind Study      | No  | Mixed dialysis population      |
| Wasio, 2008      | Nephron Clinical Practice                                   | Oral vitamin C supplementation in hemodialysis patients and its effect on the plasma level of oxidized ascorbic acid and Cu/Zn superoxide dismutase, an oxidative stress marker          | No  | No measure of desired outcomes |
| Wasse, 2014      | Journal of Vascular Access                                  | Very high-dose cholecalciferol and arteriovenous fistula maturation in ESRD: a randomized, double-blind, placebo-controlled pilot study                                                  | No  | No measure of desired outcomes |
| Weissinger, 2006 | Proteomics                                                  | Effects of oral vitamin C supplementation in hemodialysis patients: a proteomic assessment.                                                                                              | No  | No measure of desired outcomes |
| Wu, 2015         | Journal of Medicinal Food                                   | Effects of Pomegranate Extract Supplementation on Cardiovascular Risk Factors and Physical Function in Hemodialysis Patients                                                             | Yes |                                |
| Xie, 2015        | International Journal of Clinical and Experimental Medicine | Effects of fermentable dietary fiber supplementation on oxidative and inflammatory status in hemodialysis patients                                                                       | Yes |                                |
| Yeksan, 1992     | International Journal of Artificial Organs                  | Effect of vitamin E therapy on sexual functions of uremic patients in hemodialysis                                                                                                       | No  | No measure of desired outcomes |
| Yukawa, 1992     | Journal of Nutritional Science and Vitaminology             | Prevention of aortic calcification in patients on hemodialysis by long-term administration of vitamin E                                                                                  | No  | No measure of desired outcomes |
| Zachara, 2001    | Journal of Trace Elements in Medicine and Biology           | Selenium and glutathione levels, and glutathione peroxidase activities in blood components of uremic patients on hemodialysis supplemented with selenium and treated with erythropoietin | No  | No measure of desired outcomes |
| Zachara, 2009    | Acta Biochimica Polonica                                    | Selenium supplementation to chronic kidney disease patients on hemodialysis does not induce the synthesis of plasma glutathione peroxidase                                               | No  | No measure of desired outcomes |
| Zachara, 2011    | Biological Trace Element Research                           | The effect of selenium supplementation in the prevention of DNA damage in white blood cells of hemodialyzed patients: a pilot study                                                      | No  | No measure of desired outcomes |
| Zhang, 2013      | BMC Nephrology                                              | Cross-over study of influence of oral vitamin C supplementation on inflammatory status in maintenance hemodialysis patients                                                              | Yes |                                |

|             |           |                                                                                                                                                                                       |    |                                |
|-------------|-----------|---------------------------------------------------------------------------------------------------------------------------------------------------------------------------------------|----|--------------------------------|
| Zheng, 2016 | Nutrients | Cholecalciferol Additively Reduces Serum Parathyroid Hormone and Increases Vitamin D and Cathelicidin Levels in Paricalcitol-Treated Secondary Hyperparathyroid Hemodialysis Patients | No | No measure of desired outcomes |
|-------------|-----------|---------------------------------------------------------------------------------------------------------------------------------------------------------------------------------------|----|--------------------------------|
